# Supplementary material
Source: PubMed Central journal article supplement (PMC6860058)
Supplement: MCN-12-24-s002.pdf [file MCN-12-24-s002.pdf]

**Table S2.** Description of included studies

| Trial ID year         | Trial summary                                                                                                                    | Author   | Treatment groups                                                                                                                                                                                                                                                                                                                                                                                                         | Weight outcomes                                 | Feeding outcomes                                                                                                                                                                  | n (follow-up)                                                                               | Number of clusters | n (baseline)                    | EBBM | Jadad |
|-----------------------|----------------------------------------------------------------------------------------------------------------------------------|----------|--------------------------------------------------------------------------------------------------------------------------------------------------------------------------------------------------------------------------------------------------------------------------------------------------------------------------------------------------------------------------------------------------------------------------|-------------------------------------------------|-----------------------------------------------------------------------------------------------------------------------------------------------------------------------------------|---------------------------------------------------------------------------------------------|--------------------|---------------------------------|------|-------|
| Black 2001            | Complex nutritional and/or responsive feeding interventions<br>Educational video to reduce early complementary feeding practices | Black    | Controls: Not reported<br>Intervention: 15 min videotape delivered to low-income adolescent mothers featuring other adolescent mothers talking about parenting and infant feeding.<br>Video used during bi-monthly home visits by young Black women who acted as mentors. These workers were trained and supervised. Intervention delivered until follow-up at 3 months (study continues to 12 months but not reported). | –                                               | Mothers in the intervention group were four times more likely to adhere to American Academy of Paediatrics guidelines on complementary feeding (OR 3.8; 1.6 to 9.1; $P < 0.01$ ). | 121 with complete data set:<br>58 intervention<br>63 control                                | N/A                | 181 total                       | 3    | 3     |
| Melbourne Infant 2013 | Parent-focused intervention to reduce infant obesity risk behaviours                                                             | Campbell | Controls: Usual care by nurse who may have provided lifestyle advice (not assessed).<br>Intervention: Dietician delivered 6 × 2-h sessions to first-time parents during group sessions. Anticipatory messages around infant feeding, physical activity and sedentary behaviour, supported by intervention materials and a regular newsletter endorsing key messages. No theory of change described in paper.             | No difference in BMI at 9 and 20 months of age. | At 9 months of age, intervention children consumed fewer grams of non-core drinks (mean difference = $-0.45$ ; 95% CI $-7.92$ to $-0.99$ , $P = 0.01$ ).                          | 9 months<br>255 intervention<br>252 control<br>20 months<br>241 intervention<br>239 control | 62                 | 271 intervention<br>271 control | 3    | 3     |

|                  |                                             |          |                                                                                                                                                                                                                                                                                                                                                         |                                                                                                                                                                                                                                                                                                                                                                                                 |                                                                                                                                                                                                                                                                                                                                                                        |                                                                                                              |     |                                                                                       |   |
|------------------|---------------------------------------------|----------|---------------------------------------------------------------------------------------------------------------------------------------------------------------------------------------------------------------------------------------------------------------------------------------------------------------------------------------------------------|-------------------------------------------------------------------------------------------------------------------------------------------------------------------------------------------------------------------------------------------------------------------------------------------------------------------------------------------------------------------------------------------------|------------------------------------------------------------------------------------------------------------------------------------------------------------------------------------------------------------------------------------------------------------------------------------------------------------------------------------------------------------------------|--------------------------------------------------------------------------------------------------------------|-----|---------------------------------------------------------------------------------------|---|
| Nourish<br>2012  | Group classes on parenting and feeding      | Daniels  | <p>Controls: Self-directed access to usual care</p> <p>Intervention: Mothers attended six fortnightly 1.5-h interactive classes of 10–15 people per group. Anticipatory guidance sessions focused on protective feeding and parenting practices that support the development of healthy child feeding practices.</p> <p>No theory of change stated.</p> | <p>Control infants had higher BMI-z at follow-up (0.42 vs. 0.23, <math>P = 0.0009</math>). No difference in prevalence of rapid weight gain from birth to baseline. Control children were more likely to show rapid weight gain from birth to follow-up (OR = 1.6, CI = 1.1 to 2.4, <math>P = 0.008</math>), and baseline to follow-up (OR = 1.5, CI = 1.1 to 2.1, <math>P = 0.014</math>).</p> | <p>No difference in age at introduction of solids (<math>P = 0.85</math>). No difference in prevalence of breastfeeding at follow-up (<math>P = 0.78</math>). Mothers in control group were more likely to report using non-responsive feeding practices (15% vs. 4%, <math>P = 0.001</math>).</p>                                                                     | <p>9 months:<br/>291 intervention<br/>307 control</p> <p>18 months:<br/>260 intervention<br/>281 control</p> | N/A | 352 intervention<br>346 control                                                       | 3 |
| Nourish<br>2013  | Group classes on parenting and feeding      | Daniels  | <p>As above</p>                                                                                                                                                                                                                                                                                                                                         | <p>NS anthropometric outcomes (BMI z-score: <math>P = 0.10</math>). NS prevalence of overweight/obesity (control 17.9% vs. intervention 13.8%, <math>P = 0.23</math>)</p>                                                                                                                                                                                                                       | <p>Intervention group mothers had significantly less controlling feeding practices (<math>P &lt; 0.001</math>) (Child Feeding Questionnaire item), significantly less instrumental feeding (food as reward) (<math>P &lt; 0.001</math>) and significantly less parental encouragement to eat (<math>P = 0.005</math>) (Parental Feeding Style Questionnaire item).</p> | <p>2 years 251 intervention<br/>279 control</p>                                                              | -   | 352 intervention<br>346 control                                                       | 3 |
| Fewtrell<br>2013 | Bottle design, growth and feeding behaviour | Fewtrell | <p>Controls:<br/>No standard control group.<br/>Breast fed reference group</p> <p>Intervention:<br/>Bottle A, one way air valve<br/>Bottle B, internal venting system</p>                                                                                                                                                                               | <p>No significant difference in infant anthropometry at 2, 3 and 4 weeks post-partum.</p>                                                                                                                                                                                                                                                                                                       | <p>Infants using bottle A had significantly less reported fussing (mean 46 vs. 74 min per day, <math>P &lt; 0.05</math>)</p>                                                                                                                                                                                                                                           | <p>54<br/>Bottle A 29<br/>Bottle B 25</p>                                                                    | N/A | 63<br>Bottle A 31<br>Bottle B 32<br>Breastfed reference<br>Bottle A 11<br>Bottle B 13 | 2 |

**Table S2.** Continued

| Trial ID<br>year   | Trial summary                                            | Author     | Treatment groups                                                                                                                                                                                                                                                                                                                                                                                                                                                                              | Weight outcomes                                                                        | Feeding outcomes                                                                                                                                      | n (follow-up)                                         | Number of<br>clusters | n<br>(baseline)                 | EBBM | Jadad |
|--------------------|----------------------------------------------------------|------------|-----------------------------------------------------------------------------------------------------------------------------------------------------------------------------------------------------------------------------------------------------------------------------------------------------------------------------------------------------------------------------------------------------------------------------------------------------------------------------------------------|----------------------------------------------------------------------------------------|-------------------------------------------------------------------------------------------------------------------------------------------------------|-------------------------------------------------------|-----------------------|---------------------------------|------|-------|
| French<br>2012     | Anticipatory guidance<br>for infant feeding<br>practices | French     | Controls: The usual care<br>group is described as<br>the 'Bright Futures'<br>group who received<br>guidance on<br>recommended<br>breastfeeding, the<br>introduction of infant<br>food and table food and<br>avoidance of honey and<br>foods that may lead to<br>obesity.<br>Intervention: Anticipatory<br>guidance for (1) MOMS<br>– about their own<br>eating habits or (2) OP<br>– mothers in this group<br>received structured<br>infant feeding advice.<br>No theory of change<br>stated. | 12-month follow-up: No<br>differences in infant<br>growth between the<br>three groups. | MOMS mothers gave their<br>infants less juice and<br>more servings of whole<br>fruit and vegetables than<br>the BF (control) group<br>( $P < 0.05$ ). | 12-month follow-up<br>BF (99)<br>MOMS (98)<br>OP (95) | 3                     | BF (99)<br>MOMS (98)<br>OP (95) | 1    | 0     |
| Jonsdottir<br>2013 | Complementary food<br>timing                             | Jonsdottir | Controls: Exclusive<br>breastfeeding (EBF) for<br>6 months<br>Intervention:<br>Complementary foods<br>from 4 months (CF)<br>with nursing advice                                                                                                                                                                                                                                                                                                                                               | No differences in growth<br>between 4 and 6<br>months.                                 | –                                                                                                                                                     | 50 intervention<br>50 control                         | N/A                   | 119<br>60 (CF)<br>59 (EBF)      | 1    | 3     |

|                  |                                                            |            |                                                                                                                                                                                                                                                                                                                                                                                    |                                                                                                                                                                                                                |                                                             |     |                                                              |   |   |
|------------------|------------------------------------------------------------|------------|------------------------------------------------------------------------------------------------------------------------------------------------------------------------------------------------------------------------------------------------------------------------------------------------------------------------------------------------------------------------------------|----------------------------------------------------------------------------------------------------------------------------------------------------------------------------------------------------------------|-------------------------------------------------------------|-----|--------------------------------------------------------------|---|---|
| Kavanagh<br>2008 | Counselling to reduce overfeeding in bottle-fed infants    | Kavanagh   | <p>Controls: Controls received general guidance on infant feeding.</p> <p>Intervention: Intervention group received the same guidance as controls, plus specific advice to be aware of infant's satiety cues and prepare no more than 6 ounces per feed.</p> <p>Educational modules based on Kolb's Experiential Learning Cycle.</p>                                               | <p>Intervention infants were 0.46 kg heavier than controls (<math>P &lt; 0.01</math>).</p> <p>No change in bottle feeding behaviours.</p>                                                                      | <p>18 intervention<br/>20 control</p>                       | N/A | <p>61 randomised, but only 44 attended education classes</p> | 1 | 1 |
| STRIP<br>1994    | Dietary counselling to promote a diet low in saturated fat | Lapinleimu | <p>Controls: Families in the control group were seen at 7 and 13 months of age. They received basic health education typical of well-baby clinics in Finland.</p> <p>Intervention: Families in the intervention group were seen at 7, 8, 10 and 13 months and given individualised dietary counselling advice and health education about the risk factors for atherosclerosis.</p> | <p>No differences in weight or weight-for-height between the two groups at 6 months follow-up (13 months of age).</p> <p>No differences in duration of breastfeeding between groups at 6 months follow-up.</p> | <p>13 months of age:<br/>19 intervention<br/>22 control</p> | N/A | <p>22 intervention<br/>23 control</p>                        | 2 | 2 |

**Table S2.** Continued

| Trial ID<br>year | Trial summary                                              | Author     | Treatment groups                                                                                                                                                                                                                                                                                                                                                                                                                                                                                 | Weight outcomes                                             | Feeding outcomes | n (follow-up)                                        | Number of<br>clusters | n<br>(baseline)                 | EBBM | Jadad |
|------------------|------------------------------------------------------------|------------|--------------------------------------------------------------------------------------------------------------------------------------------------------------------------------------------------------------------------------------------------------------------------------------------------------------------------------------------------------------------------------------------------------------------------------------------------------------------------------------------------|-------------------------------------------------------------|------------------|------------------------------------------------------|-----------------------|---------------------------------|------|-------|
| STRIP<br>1995    | Dietary counselling to promote a diet low in saturated fat | Lapinleimu | <p>Controls: Control families were met twice (7 and 13 months of age). Unrestricted diet was permitted but they were advised to breastfeed until the child was 1 year old; thereafter cow's milk with at least 1.9% fat.</p> <p>Intervention: Intensive health education at 7, 8, 10 and 13 months designed to reduce child's risk of atherosclerosis and coronary heart disease. Breastfeeding advised for as long as possible; thereafter skimmed milk.</p> <p>No theory of change stated.</p> | No difference in weight between groups at 13 months of age. | -                | 13 months of age:<br>511 intervention<br>494 control | N/A                   | 540 intervention<br>522 control | 2    | 2     |

| SLIMTIME       | Nurse home visits to support new mothers who intended to breastfeed | Paul      | Controls: Parenting booklet with traditional advice on handling night awakenings (feeding, rocking, change of diaper).<br>Intervention: Soothe/sleep – implemented 2–3 weeks after birth and was designed to increase sleep duration in early infancy by teaching parents alternate soothing and calming strategies to reduce feeding as a first response to fussiness. Introduction of solids – taught parents at 2–3 weeks about hunger and satiety cues as well as the appropriate timing for the introduction of solid foods.<br>No theory of change stated. | At 1 year, infants who received both interventions had lower weight-for-length percentiles ( $P = 0.009$ ) and a mean weight-for-length in the 33rd percentile. Infants receiving the soothe/sleep intervention only infants gained weight more slowly over first 12 months ( $P = 0.002$ ). | Infants who were predominantly breastfed at 16 weeks demonstrated a slower pattern of weight gain over first year of life ( $P = 0.002$ ) – Note: intervention-independent.                                              | 22 (soothe/sleep plus introduction of solids)<br>29 (soothe/sleep only)<br>30 control | N/A | 42 (soothe/sleep plus introduction of solids)<br>39 (soothe/sleep only)<br>38 (introduction of solids only)<br>41 control | 1 | 0 |
|----------------|---------------------------------------------------------------------|-----------|------------------------------------------------------------------------------------------------------------------------------------------------------------------------------------------------------------------------------------------------------------------------------------------------------------------------------------------------------------------------------------------------------------------------------------------------------------------------------------------------------------------------------------------------------------------|----------------------------------------------------------------------------------------------------------------------------------------------------------------------------------------------------------------------------------------------------------------------------------------------|--------------------------------------------------------------------------------------------------------------------------------------------------------------------------------------------------------------------------|---------------------------------------------------------------------------------------|-----|---------------------------------------------------------------------------------------------------------------------------|---|---|
| WATT 2010      | Lay worker home visits to support infant feeding practices          | Scheiwe   | Controls: As Watt <i>et al.</i> (2009).<br>Intervention: As Watt <i>et al.</i> (2009).                                                                                                                                                                                                                                                                                                                                                                                                                                                                           | No difference in weight outcomes at 4-year follow-up.                                                                                                                                                                                                                                        | Intervention children consumed more pure fruit juice (RR = 1.57; 95% CI 0.99, 2.49) and more likely to never drink squash (RR 1.76; 95% CI 1.2, 2.58).                                                                   | 4 years follow-up:<br>55 intervention<br>46 control                                   | N/A | 157 intervention<br>155 control                                                                                           | 3 | 3 |
| Verbestel 2013 | Overweight prevention study                                         | Verbestel | Controls: Usual care<br>Intervention: Family-based lifestyle intervention underpinned by specific behaviour-orientated theories: (1) information-processing; (2) elaboration-likelihood model; and (3) precaution-adoption process model.                                                                                                                                                                                                                                                                                                                        | In toddlers aged 9–24 months, BMI z-score decreased in both groups but more in the intervention group.                                                                                                                                                                                       | No significant intervention effects were found on the lifestyle behaviours targeted by the intervention, but over a period of 1 year dietary-related behaviours developed in the unhealthy direction in both conditions. | 12 months<br>100 intervention<br>56 control                                           | 57  | 126 intervention<br>65 control                                                                                            | 0 | 0 |

**Table S2.** Continued

| Trial ID year | Trial summary                                              | Author | Treatment groups                                                                                                                                                                                                                                                                                                                                                                                                                                                                                                                                                                      | Weight outcomes                                                                                                                | Feeding outcomes                                                                                                                                                                                                                                              | n (follow-up)                                                                                                   | Number of clusters | n (baseline)                                                 | EBBM | Jadad |
|---------------|------------------------------------------------------------|--------|---------------------------------------------------------------------------------------------------------------------------------------------------------------------------------------------------------------------------------------------------------------------------------------------------------------------------------------------------------------------------------------------------------------------------------------------------------------------------------------------------------------------------------------------------------------------------------------|--------------------------------------------------------------------------------------------------------------------------------|---------------------------------------------------------------------------------------------------------------------------------------------------------------------------------------------------------------------------------------------------------------|-----------------------------------------------------------------------------------------------------------------|--------------------|--------------------------------------------------------------|------|-------|
| Watt 2009     | Lay worker home visits to support infant feeding practices | Watt   | <p>Controls: Standard support from health visitors and General Practitioners (GPs).<br/>                     Intervention: Monthly home visits were offered from 3 months of age until first birthday by trained volunteers. Designed to empower women to follow current guidance about infant feeding practices, in particular when to introduce solids, the types of foods and drinks to give a child with emphasis on the importance of fruit and vegetables and when to stop using a feeding bottle.<br/>                     Social support theory underpinned intervention.</p> | <p>Intervention infants were 0.4 kg heavier than controls at 12 months of age (CI = 0.1 to 0.7 kg, <math>P = 0.05</math>).</p> | <p>At 12 months: No significant differences in duration of exclusive breastfeeding. No significant differences in age at introduction to solids. Intervention infants consumed significantly more fruit and vegetables at 12 and 18 months than controls.</p> | <p>12 months: 115 intervention 124 control<br/>                     18 months: 104 intervention 108 control</p> | N/A                | <p>157 intervention<br/>                     155 control</p> | 3    | 3     |

| Healthy Beginnings 2011 | Nurse home visits to promote positive infant feeding and lifestyle practices | Wen | Controls: Usual care, but home safety promotion materials were sent out at 6 and 12 months in improve retention of controls.<br>Intervention: Intervention families received five or six home visits from a specially trained nurse who delivered a staged home-based intervention in the antenatal period (30–36 weeks gestation) and at 1, 3, 5, 9 and 12 months promoting healthy feeding, physical activity and parent–child interaction.<br>Health belief model. | – | Breastfeeding rates were significantly higher in the intervention group than in the control group at both 6 and 12 months (42.2% vs. 32.1% and 21.0% vs. 14.9%, respectively).<br>At 12 months, the median breastfeeding duration was 17 weeks (95% CI, 13.9–20.4 weeks) in the intervention group compared with 13 weeks (95% CI, 10.1–15.6 weeks) in the control group ( $P = 0.03$ , log-rank test). The hazard ratio for stopping breastfeeding in the intervention group was 0.82 (95% CI, 0.68–0.99).<br>The intervention also resulted in a significantly later introduction of solid foods ( $P < 0.001$ for trend), reducing the proportion of mothers who introduced solids before 6 months by 12% (95% CI, 4–20%) from 74% to 62%.<br>The intervention also decreased the age at which infants started tummy time ( $P = 0.03$ for trend) and increased daily practice of tummy time by 7% from 76% to 83% ( $P = 0.05$ ).<br>At 12-month follow-up, fewer intervention mothers used food for reward ( $P = 0.04$ ), gave a bottle at bedtime ( $P = 0.04$ ). There was greater proportion of intervention infants drinking from a cup ( $P = 0.01$ ). | 6-month follow-up: 278 intervention 283 control<br>12-month follow-up: 268 intervention 259 control | N/A | 337 intervention<br>330 control | 1 | 3 |
|-------------------------|------------------------------------------------------------------------------|-----|-----------------------------------------------------------------------------------------------------------------------------------------------------------------------------------------------------------------------------------------------------------------------------------------------------------------------------------------------------------------------------------------------------------------------------------------------------------------------|---|-------------------------------------------------------------------------------------------------------------------------------------------------------------------------------------------------------------------------------------------------------------------------------------------------------------------------------------------------------------------------------------------------------------------------------------------------------------------------------------------------------------------------------------------------------------------------------------------------------------------------------------------------------------------------------------------------------------------------------------------------------------------------------------------------------------------------------------------------------------------------------------------------------------------------------------------------------------------------------------------------------------------------------------------------------------------------------------------------------------------------------------------------------------------|-----------------------------------------------------------------------------------------------------|-----|---------------------------------|---|---|
|-------------------------|------------------------------------------------------------------------------|-----|-----------------------------------------------------------------------------------------------------------------------------------------------------------------------------------------------------------------------------------------------------------------------------------------------------------------------------------------------------------------------------------------------------------------------------------------------------------------------|---|-------------------------------------------------------------------------------------------------------------------------------------------------------------------------------------------------------------------------------------------------------------------------------------------------------------------------------------------------------------------------------------------------------------------------------------------------------------------------------------------------------------------------------------------------------------------------------------------------------------------------------------------------------------------------------------------------------------------------------------------------------------------------------------------------------------------------------------------------------------------------------------------------------------------------------------------------------------------------------------------------------------------------------------------------------------------------------------------------------------------------------------------------------------------|-----------------------------------------------------------------------------------------------------|-----|---------------------------------|---|---|



**Table S2.** Continued

| Trial ID year           | Trial summary                                                                        | Author   | Treatment groups                                                                                                                                                                                                                                                                                                              | Weight outcomes                                                                                                                                                                                                | Feeding outcomes                                                                                                                                                                                    | n (follow-up)                                          | Number of clusters | n (baseline)                               | EBBM | Jadad |
|-------------------------|--------------------------------------------------------------------------------------|----------|-------------------------------------------------------------------------------------------------------------------------------------------------------------------------------------------------------------------------------------------------------------------------------------------------------------------------------|----------------------------------------------------------------------------------------------------------------------------------------------------------------------------------------------------------------|-----------------------------------------------------------------------------------------------------------------------------------------------------------------------------------------------------|--------------------------------------------------------|--------------------|--------------------------------------------|------|-------|
| Healthy Beginnings 2012 | Nurse home visits to promote positive infant feeding and lifestyle practices         | Wen      | Controls: Usual care, but home safety promotion materials were sent out at 6 and 12 months to improve retention of controls<br>Intervention: As Wen <i>et al.</i> (2011), but with additional visits at 18 and 24 months (Total: eight visits).<br>Health belief model.                                                       | For the complete case analysis, mean BMI is significantly lower in the intervention group (16.49, SD 1.76) than the control group (16.87, SD 1.62). BMI difference -0.38 (95% CI -0.68 to -0.08), $P = 0.01$ . | Children in intervention group more likely to eat one or more servings of vegetables a day (84%, $P = 0.03$ ) and significantly less likely to be given food for reward (62% vs. 72%, $P = 0.03$ ). | 24-month follow-up:<br>255 intervention<br>242 control | N/A                | 337 intervention<br>330 control            | 1    | 3     |
| Albermaz 2003           | Breastfeeding promotion and lactation support interventions<br>Lactation counselling | Albermaz | Controls: Attended generic paediatric clinics.<br>Intervention: No theory of change stated.<br>Initial hospital counselling session followed by seven home visits (5, 15, 30, 45, 60, 90 and 120 days) by trained lactation nurses. Option for additional visits if needed. Hotline available.<br>No theory of change stated. | No difference in weight between groups.                                                                                                                                                                        | Control mothers twice as likely to stop breastfeeding by 4 months (prevalence ratio 1.85; $P = 0.04$ ).<br>Breast milk and water intake at 4 months did not differ between groups.                  | 167<br>85 intervention<br>82 control                   | N/A                | 188 total<br>94 intervention<br>94 control | 3    | 2     |

|                                           |                                                                          |         |                                                                                                                                                                                                                                                                                                                        |                                                                                                                                                                                                                                                                                                                                                                |                          |     |                              |   |
|-------------------------------------------|--------------------------------------------------------------------------|---------|------------------------------------------------------------------------------------------------------------------------------------------------------------------------------------------------------------------------------------------------------------------------------------------------------------------------|----------------------------------------------------------------------------------------------------------------------------------------------------------------------------------------------------------------------------------------------------------------------------------------------------------------------------------------------------------------|--------------------------|-----|------------------------------|---|
| Moms into Learning about Kids (MILK) 2005 | Pre- and post-natal lactation counselling                                | Bonuck  | <p>Controls: Usual care. Intervention: Breastfeeding promotion intervention. A lactation counsellor was available to women for home visits and telephone consultations prenatally and for a further 12 months. Practical instruction in latching on, positioning and other techniques. No theory of change stated.</p> | <p>Intervention group more likely to breastfeed through to week 20 (53% vs. 39.3%). Exclusive breastfeeding rates did not differ between groups. Control group had a lower breastfeeding intensity (i.e. offered more formula feeds than breast) than intervention mothers at 13 (OR = 5.22, CI 2.43 to 11.22) and 52 weeks (OR = 5.25, CI 2.43 to 11.22).</p> | 145 intervention control | N/A | 188 intervention 194 control | 2 |
| Chapman 2013                              | Breastfeeding education and support trial for overweight and obese women | Chapman | <p>Controls: Standard care. Intervention: Specialised breastfeeding peer counselling – comprising three antenatal visits, daily in-hospital support, up to 11 post-partum home visits promoting exclusive breastfeeding and addressing obesity-related breastfeeding barriers.</p>                                     | <p>No impact on exclusive breastfeeding or breastfeeding continuation at 1, 3, 6 months post-partum. At 2 weeks post-partum, the intervention group has significantly greater odds of continuing any breastfeeding (adjusted OR): 3.76 (95% CI: 1.07, 13.22) and giving at least 50% of feedings as breast milk (adjusted OR): 4.47 (95% CI: 1.38, 14.5).</p>  | -                        | -   | 206 total                    | 2 |

**Table S2.** Continued

| Trial ID year | Trial summary                             | Author | Treatment groups                                                                                                                                                                                                                                                                                                                                    | Weight outcomes                                                                                                                                                                                                                                 | Feeding outcomes                                                                                                                                                                                                                                                                                                                                                                                                                                                                                                                                                                                                                                     | n (follow-up)                                                                                    | Number of clusters               | n (baseline)                         | EBBM | Jadad |
|---------------|-------------------------------------------|--------|-----------------------------------------------------------------------------------------------------------------------------------------------------------------------------------------------------------------------------------------------------------------------------------------------------------------------------------------------------|-------------------------------------------------------------------------------------------------------------------------------------------------------------------------------------------------------------------------------------------------|------------------------------------------------------------------------------------------------------------------------------------------------------------------------------------------------------------------------------------------------------------------------------------------------------------------------------------------------------------------------------------------------------------------------------------------------------------------------------------------------------------------------------------------------------------------------------------------------------------------------------------------------------|--------------------------------------------------------------------------------------------------|----------------------------------|--------------------------------------|------|-------|
| PROBIT 2001   | Hospital-based promotion of breastfeeding | Kramer | <p>Controls: Usual care. Intervention: The breastfeeding intervention was modelled on step 10 of the Baby Friendly Hospital Initiative (post-natal support). The chief obstetrician or paediatrician at each clinic received 18 h of Baby Friendly Hospital Initiative (BFHI) lactation management training course. No theory of change stated.</p> | -                                                                                                                                                                                                                                               | <p>Proportion of control mothers breastfeeding at 3 months was greater than expected. Significantly higher rates of breastfeeding at 3 months in the intervention group. Proportion of women exclusively breastfeeding was sevenfold higher in intervention clinics at 3 months (43.3% vs. 6.4%; <math>P \leq 0.001</math>) and more than 12-fold higher at 6 months (7.9% vs. 0.6%; <math>P = 0.01</math>). Almost twice as many intervention mothers were predominately breastfeeding at 3 months (51.9% vs. 28.3%; adjusted OR, 0.28; 95% CI, 0.016–0.49) and nearly seven times as many at 6 months (10.6% vs. 1.6%; <math>P = 0.03</math>).</p> | 8547 intervention<br>7895 control                                                                | 16<br>intervention<br>15 control | 8865<br>intervention<br>8181 control | 1    | 2     |
| PROBIT 2001   | Hospital-based promotion of breastfeeding | Kramer | <p>Controls: See Kramer <i>et al.</i> (2001). Intervention: See Kramer <i>et al.</i> (2001).</p>                                                                                                                                                                                                                                                    | <p>Mean weight was significantly higher in the experimental group at 1 (4341 g vs. 4280 g), <math>P = 0.001</math> and 3 months (6152 g vs. 6047 g), <math>P &lt; 0.001</math>. The difference was NS by 12 months (10 564 g vs. 10 571 g).</p> | <p>See Kramer <i>et al.</i> (2001).</p>                                                                                                                                                                                                                                                                                                                                                                                                                                                                                                                                                                                                              | 1 month:<br>8630 intervention<br>8062 control<br>12 months:<br>8553 intervention<br>7918 control | See Kramer <i>et al.</i> (2001). | See Kramer <i>et al.</i> (2001).     | 1    | 2     |

|                                                    |                                           |         |                                                                                                                                                                                                                                                                                                                                                                                                                |                                                                                                                                                                                                                                                                                                                                                                             |                                                                                                                   |                                                    |                                  |   |   |
|----------------------------------------------------|-------------------------------------------|---------|----------------------------------------------------------------------------------------------------------------------------------------------------------------------------------------------------------------------------------------------------------------------------------------------------------------------------------------------------------------------------------------------------------------|-----------------------------------------------------------------------------------------------------------------------------------------------------------------------------------------------------------------------------------------------------------------------------------------------------------------------------------------------------------------------------|-------------------------------------------------------------------------------------------------------------------|----------------------------------------------------|----------------------------------|---|---|
| PROBIT<br>2007                                     | Hospital-based promotion of breastfeeding | Kramer  | Controls: See Kramer <i>et al.</i> (2001).<br>Intervention: See Kramer <i>et al.</i> (2001).                                                                                                                                                                                                                                                                                                                   | 6.5 years follow-up: No significant intervention effects were observed on height, BMI, waist or hip circumference, triceps or subscapular skinfold thickness or systolic or diastolic blood pressure.                                                                                                                                                                       | See Kramer <i>et al.</i> (2001).                                                                                  | 6.5 years: 7108 intervention<br>6781 control       | See Kramer <i>et al.</i> (2001). | 1 | 2 |
| Morrow<br>1999                                     | Lactation counselling by a peer mentor    | Morrow  | Controls: Control mothers with lactation problems were referred to their own physicians.<br>Intervention: Breastfeeding support and education following La Leche league guidance.<br>Group 1: Six-visit group (visited by peer counsellor in mid and late pregnancy, and 1, 2, 4 and 8 weeks post-partum). Group 2: Three-visit group (late pregnancy, 1, 2 weeks post-partum).<br>No theory of change stated. | No differences in breastfeeding initiation. At 3 months post-partum, exclusive breastfeeding was practised by 67% of six-visit, 50% of three-visit and 12% of control mothers (intervention groups vs. controls, $P < 0.001$ ; six-visit vs. three-visit, $P = 0.02$ ). Breastfeeding duration significantly ( $P = 0.02$ ) longer in intervention groups than in controls. | See Kramer <i>et al.</i> (2001).                                                                                  | 42 (six-visit)<br>50 (three-visit)<br>33 (control) | 31                               | 3 | 2 |
| Parenting support interventions<br>MOMENTS<br>2011 | Peer mentoring for first-time mothers     | Cupples | Controls: Usual care.<br>Intervention: Fortnightly home visits by trained peer volunteers during pregnancy and monthly during the following year, providing health-related information.<br>No theory of change stated.                                                                                                                                                                                         | No difference in weight between groups (mean difference in SDS weight, $-0.55$ , 95% CI $-0.33$ to $0.21$ ).                                                                                                                                                                                                                                                                | No difference in % breastfeeding at 6 weeks (95% CI = $9.7$ to $21.3$ intervention vs. $11.4$ to $22.9$ control). | 135 intervention<br>145 control                    | N/A                              | 4 | 3 |

**Table S2.** Continued

| Trial ID                                                    | Trial summary                                                                                 | Author   | Treatment groups                                                                                                                                                                                                                                                                                         | Weight outcomes                                                                                          | Feeding outcomes                                                                                                                                                                                                    | n (follow-up)                                                                | Number of clusters | n (baseline)                           | EBBM | Jadad |
|-------------------------------------------------------------|-----------------------------------------------------------------------------------------------|----------|----------------------------------------------------------------------------------------------------------------------------------------------------------------------------------------------------------------------------------------------------------------------------------------------------------|----------------------------------------------------------------------------------------------------------|---------------------------------------------------------------------------------------------------------------------------------------------------------------------------------------------------------------------|------------------------------------------------------------------------------|--------------------|----------------------------------------|------|-------|
| Community Mothers 1993                                      | Peer mentoring for first-time mothers                                                         | Johnson  | Controls: Received standard support from local public health nurse at birth and 6 weeks, and at other times if required.<br>Intervention: Monthly home visits for 1 year from a community mother to support and encourage first-time parents.<br>Based on Bristol Early Childhood Development Programme. | -                                                                                                        | Intervention infants were introduced to cow's milk significantly later (10.1 weeks vs. 28 weeks (10.1 weeks 95% CI 6.4 to 13.5 weeks, $P < 0.001$ ).<br>Controls consumed significantly more 'inappropriate' foods. | 232<br>127 intervention<br>105 control.                                      | N/A                | 262<br>141 intervention<br>121 control | 2    | 2     |
| PROKIND 2010                                                | Counselling to promote awareness of health risks in socially deprived areas                   | Jungmann | Controls: Usual care<br>Intervention: Counselling to improve awareness of health risks                                                                                                                                                                                                                   | No significant differences in weight between intervention and control group throughout the study period. | -                                                                                                                                                                                                                   | 12-month follow-up (with weight outcomes):<br>96 control<br>114 intervention | N/A                | 362 control<br>393 Intervention        | 2    | 3     |
| Miller Early Childhood Sustained Home-visiting (MECSH) 2011 | Sustained and structured nurse home visiting to provide parenting and family health education | Kemp     | Controls: Usual universal care<br>Intervention: Women received an average of 16.3 visits (60–90 min duration) by a child health nurse from 26 weeks gestation until the child's second birthday. Programme of parenting education and support.<br>No theory of change stated.                            | -                                                                                                        | Breastfeeding duration mean difference = 7.88 (2.89 to 12.88), effect size 0.49, $P = 0.002$ , power 0.93.<br>Transition to solids mean difference -1.32 (-3.47 to 0.83), $P = 0.23$ .                              | 63 intervention<br>44 control                                                | N/A                | 111 intervention<br>97 control         | 1    | 2     |

| Author      | Intervention                                                                                                                                 | Control                                                                                                                                                                                      | Outcome                                                                                                                                                                                                                                                                                                                                                                | Follow-up                                                                                       | Sample Size                              | Notes                                                                                                                   |
|-------------|----------------------------------------------------------------------------------------------------------------------------------------------|----------------------------------------------------------------------------------------------------------------------------------------------------------------------------------------------|------------------------------------------------------------------------------------------------------------------------------------------------------------------------------------------------------------------------------------------------------------------------------------------------------------------------------------------------------------------------|-------------------------------------------------------------------------------------------------|------------------------------------------|-------------------------------------------------------------------------------------------------------------------------|
| Dewey 1994  | Exercise classes for lactating women                                                                                                         | Women who did not engage in aerobic exercise more than once per week during the same period as the intervention.                                                                             | Weight of infants during the study period.                                                                                                                                                                                                                                                                                                                             | 18 intervention, 15 control                                                                     | 188 mothers, 92 intervention, 96 control | No differences in the volume of breast milk intake during the study period. No difference in maternal prolactin levels. |
| Hauner 2012 | Consumption of fish-oil capsules and vitamin E supplements and counselling to reduce polyunsaturated fat intake in pre- and post-natal women | From 15 weeks gestation, pregnant women received brief semi-structured counselling on a healthy balanced diet, and were explicitly asked to refrain from taking fish-oil or DHA supplements. | Newborns in the intervention group had higher birth weight (mean difference = 178 g, 95% CI 31 to 324, $P = 0.019$ ), higher weight-for-length, and BMI (reported as being caused by prolonged gestation in the intervention group). These differences were not apparent at follow-up at 6 weeks, 4 and 12 months. No differences in infant fat mass and distribution. | 4-month follow-up: 87 intervention, 97 control; 12-month follow-up: 87 intervention, 83 control | 188 mothers, 92 intervention, 96 control | No differences in breastfeeding status between groups.                                                                  |

**Table S2.** Continued

| Trial ID<br>year                                | Trial summary                                                                      | Author    | Treatment groups                                                                                                                                                                                                                                                                                        | Weight outcomes                                                                                                                                                                                                                                                                                                                                                                                                                                                                                                                                                                 | Feeding outcomes | n (follow-up)                                      | Number of<br>clusters | n<br>(baseline)                                    | EBBM | Jadad |
|-------------------------------------------------|------------------------------------------------------------------------------------|-----------|---------------------------------------------------------------------------------------------------------------------------------------------------------------------------------------------------------------------------------------------------------------------------------------------------------|---------------------------------------------------------------------------------------------------------------------------------------------------------------------------------------------------------------------------------------------------------------------------------------------------------------------------------------------------------------------------------------------------------------------------------------------------------------------------------------------------------------------------------------------------------------------------------|------------------|----------------------------------------------------|-----------------------|----------------------------------------------------|------|-------|
| Laitinen<br>2009                                | Dietary counselling<br>and the<br>consumption of<br>plant stanol ester<br>products | Laitinen  | Controls: Usual care<br>Intervention: Pregnant<br>women received<br>counselling to follow a<br>balanced diet and to<br>consume foods enriched<br>with plant stanol esters.<br>No theory of change<br>stated – but note this<br>study was about patient<br>safety of the diet not<br>obesity prevention. | Intervention had no<br>impact on the infants'<br>growth up to the age of<br>12 months. The mean<br>height SD scores and<br>weights proportional to<br>heights were also within<br>the population reference<br>range in both groups.                                                                                                                                                                                                                                                                                                                                             | –                | 11 intervention<br>10 control                      | N/A                   | 11 intervention<br>10 control                      | 0    | 0     |
| EU<br>Childhood<br>Obesity<br>Programme<br>2012 | Consumption of high<br>or low protein<br>formula milk                              | Escribano | Controls: No standard<br>control group. Breastfed<br>comparison group.<br>Intervention:<br>Group 1: LP formula<br>Group 2: HP formula<br>Both formulas provided<br>the same energy<br>content.<br>Non-behavioural study.                                                                                | 6-month follow-up: HP<br>group had significantly<br>higher weight,<br>weight-for-length and<br>BMI than the LP group<br>(no difference in body<br>length) and BF group.<br>BF infants did not differ<br>from LP infants on any<br>of the anthropometric<br>measures. Weight gain<br>velocity from baseline to<br>6 months was<br>significantly higher<br>among HP infants as<br>compared with those in<br>LP group ( $P = 0.015$ )<br>and those in the BF<br>group ( $P = 0.009$ ). No<br>differences in weight<br>gain velocity were<br>detected between LP<br>and BF infants. | –                | 63<br>LP group: 21<br>HP group: 17<br>BF group: 25 | N/A                   | 66<br>LP group: 24<br>HP group: 17<br>BF group: 25 | –    | 4     |

|                                                 |                                                                       |          |                                                                                                                                                                                                       |                                                                                                                                                                                                                                                                                                                                                                       |   |                                                                                                                                                                                                                             |     |                                          |   |   |
|-------------------------------------------------|-----------------------------------------------------------------------|----------|-------------------------------------------------------------------------------------------------------------------------------------------------------------------------------------------------------|-----------------------------------------------------------------------------------------------------------------------------------------------------------------------------------------------------------------------------------------------------------------------------------------------------------------------------------------------------------------------|---|-----------------------------------------------------------------------------------------------------------------------------------------------------------------------------------------------------------------------------|-----|------------------------------------------|---|---|
| EU<br>Childhood<br>Obesity<br>Programme<br>2009 | Consumption of high<br>or low protein<br>formula milk                 | Koletzko | Controls: Breastfed<br>comparison group; not<br>randomly allocated.<br>Intervention:<br>Group 1: LP cow's<br>milk-based formula<br>Group 2: HP cow's<br>milk-based formula.<br>Non-behavioural study. | No difference in length<br>between groups at any<br>follow-up.<br>LP infants had lower<br>weight-for-length z-score<br>than HP infants at the<br>24-month follow-up and<br>did not differ from BF<br>infants.                                                                                                                                                         | - | 6-month follow-up:<br>1200<br>428 (LP)<br>423 (HP)<br>349 (BF)<br>12-month follow-up:<br>1094<br>384 (LP)<br>383 (HP)<br>327 (BF)<br>24-month follow-up:<br>933<br>313 (LP)<br>322 (HP)<br>298 (BF)<br>CMF (32)<br>PHF (24) | N/A | 1757<br>564 (LP)<br>574 (HP)<br>619 (BF) | - | 5 |
| Mennella-Growth<br>2011                         | Consumption of CMF<br>or protein<br>hydrolysate formula<br>(PHF) milk | Mennella | Controls: CMF<br>Intervention: PHF<br>Non-behavioural study                                                                                                                                           | Infants fed PHF had<br>significantly lower<br>weight-for-length<br>z-scores from 2.5 to 7<br>months than CMF<br>infants. There were no<br>differences in<br>length-for-age z-scores.<br>PHF infants had slower<br>weight gain velocity<br>than CMF infants. PHF<br>infants consumed less<br>formula to satiation<br>than CMF infants<br>during the 7-month<br>period. | - | CMF (35)<br>PHF (29)                                                                                                                                                                                                        | N/A | CMF (35)<br>PHF (29)                     | - | 4 |



**Table S2.** Continued

| Trial ID year                     | Trial summary                                         | Author | Treatment groups                                                                                                                                                                                                                                                                                                                                                                                                                                                                  | Weight outcomes                                                                                                                                                                                                         | Feeding outcomes | n (follow-up)                                                                                                                                                                                                                                                                                                                                                           | Number of clusters | n (baseline)                                                       | EBBM | Jadad |
|-----------------------------------|-------------------------------------------------------|--------|-----------------------------------------------------------------------------------------------------------------------------------------------------------------------------------------------------------------------------------------------------------------------------------------------------------------------------------------------------------------------------------------------------------------------------------------------------------------------------------|-------------------------------------------------------------------------------------------------------------------------------------------------------------------------------------------------------------------------|------------------|-------------------------------------------------------------------------------------------------------------------------------------------------------------------------------------------------------------------------------------------------------------------------------------------------------------------------------------------------------------------------|--------------------|--------------------------------------------------------------------|------|-------|
| GINI 2009                         | Consumption of hydrolysed protein formula milk or CMF | Rzehak | Controls: An exclusive breastfeeding comparison group is included in addition to the four formula milk variants, however, this is not a randomised control group.<br>Intervention: Infants randomly assigned at birth to one of four formula milks, three of which they refer to as hydrolysed infant formulas, one partially hydrolysed whey (pHF-W), extensively hydrolysed whey (eHF-W), extensively hydrolysed casein (eHF-C) and one standard CMF.<br>Non-behavioural study. | Significantly slower sex-adjusted BMI gain during first year of life for infants in the eHF-C formula milk (-0.1 to -0.2 lower BMI standard deviation scores). No significant differences reported at 6-year follow-up. | -                | 1 year follow-up<br>226 (pHF-W)<br>238 (eHF-W)<br>228 (eHF-C)<br>249 (CMF)<br>740 (BF)<br>2 years follow-up<br>204 (pHF-W)<br>216 (eHF-W)<br>203 (eHF-C)<br>220 (CMF)<br>665 (BF)<br>4 years follow-up<br>134 (pHF-W)<br>135 (eHF-W)<br>110 (eHF-C)<br>147 (CMF)<br>520 (BF)<br>6 years follow-up<br>184 (pHF-W)<br>191 (eHF-W)<br>167 (eHF-C)<br>202 (CMF)<br>642 (BF) | N/A                | 253 (pHF-W)<br>265 (eHF-W)<br>250 (eHF-C)<br>276 (CMF)<br>796 (BF) | -    | 5     |
| EU Childhood Obesity Program 2011 | Consumption of high or low protein formula milk       | Socha  | Controls: Breastfed comparison group not randomly allocated.<br>Intervention: Infants were provided with infant and follow-on formulas that were designated LP or HP for the first year of life.<br>Non-behavioural study.                                                                                                                                                                                                                                                        | Insulin-like growth factor (IGF)-1 at 6 months of age was associated with weight at 6, 12 and 24 months, but with weight gain only during the first 6 months of life.                                                   | -                | 1324<br>6 months: 513<br>(breakdown across groups not reported)<br>12 months: 445<br>(breakdown across groups not reported)<br>24 months: 366<br>(breakdown across groups not reported)                                                                                                                                                                                 | N/A                | 1678<br>540 (LP)<br>550 (HP)<br>588 (BF)                           | -    | 5     |

BMI, body mass index; CI, confidence interval; CMF, cow's milk formula; DHA, docosahexaenoic acid; EBBM, evidence-based behavioural medicine; HP, higher protein; LCPUFA, long-chain polyunsaturated fatty acids; LP, lower protein; MOMS, maternal-focused intervention; N/A, not applicable; NS, non-significant; OP, ounce of prevention; OR, odds ratio; RR, relative risk; SD, standard deviation.
